# Supplementary material for: Impact of HO 2 /RO 2 ratio on highly oxygenated α-pinene photooxidation products and secondary organic aerosol formation potential
Source: Copernicus journal article supplement (doi:10.5194/egusphere-2023-2402), 2023-10-26
Supplement: Supplementary file 1 [file egusphere-2023-2402-supplement.pdf]

1 *Supplement to*  
2 **Impact of HO<sub>2</sub>/RO<sub>2</sub> ratio on highly oxygenated  $\alpha$ -pinene photooxidation**  
3 **products and secondary organic aerosol formation potential**

4

5

6 Yarê Baker et al.

7

8 *Correspondence to:* Thomas F. Mentel (t.mentel@fz-juelich.de)

## 9 S1 Sulfuric acid calibration for MION-API-LTOF

10 The calibration source setup used by us was described in detail by Kürten et al. (2012) and was recently applied to a newer  
11 model of the MION chemical ionization inlet by He et al. (2023). In short  $\text{H}_2\text{SO}_4$  is produced via the reaction of  $\text{SO}_2$  with  
12  $\text{OH}$  in a calibration source directly in front of the instrument.  $\text{OH}$  is produced via the photolysis of water from a humidified  
13  $\text{N}_2$  flow and the  $\text{H}_2\text{SO}_4$  concentration is varied by variation of the humidified inflow.

14 The expected  $\text{H}_2\text{SO}_4$  concentration is calculated with an open-source python library provided by Shen and He (2023). The  
15 model simulates the necessary gas phase chemistry based on a set of differential equations and uses two-dimensional  
16 convection-diffusion-reaction equations to take into account the losses of  $\text{H}_2\text{SO}_4$  in the tubing. All that is needed for this  
17 calculation is the dimensions of the exact calibration setup. Details about the model can be found in He et al. (2023).

18 For the analyte signal we used the signal sum of the detected product ions  $\text{HSO}_4^-$ ,  $\text{H}_2\text{SO}_4(\text{NO}_3)^-$  and  $\text{H}_2\text{SO}_4(\text{HNO}_3\text{NO}_3)^-$  and  
19 normalized the signal with the sum of the  $\text{NO}_3^-$  ion and  $(\text{HNO}_3\text{NO}_3)^-$  cluster. The resulting calibration curve can be found in  
20 **Figure S1**. The calibration yielded a calibration factor of  $7.0 \cdot 10^9$  molecules $\cdot\text{cm}^{-3}\cdot\text{ncps}^{-1}$ , which is in the range of calibration  
21 factors reported before for different  $\text{NO}_3^-$ -MION inlets, for comparison see Rissanen et al. (2019)  
22 ( $1.4 \cdot 10^9$  molecules $\cdot\text{cm}^{-3}\cdot\text{ncps}^{-1}$ ) and He et al. (2023) ( $1.3 \cdot 10^{10}$  molecules $\cdot\text{cm}^{-3}\cdot\text{ncps}^{-1}$ ).

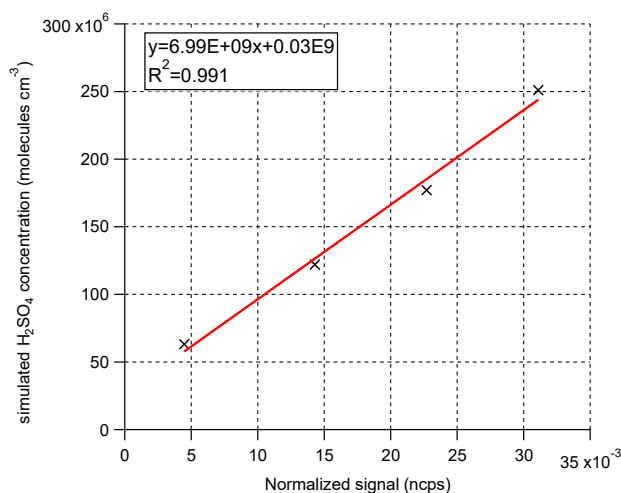

23  
24 **Figure S1: Calibration curve  $\text{NO}_3^-$ -MION-CIMS for  $\text{H}_2\text{SO}_4$  calibration set-up**

## 25 S2 Particle loss rate constant determination in SAPHIR STAR

26 The particle loss rate in the SAPHIR STAR chamber was determined by observation of the seed concentration decay in the  
27 chamber after stop of the particle addition. The exponential decay was fitted logarithmic as shown in **Eq. (S1)** and the  
28 lifetime  $\tau_{particle}$  ( $k_{particleLoss} = \frac{1}{\tau_{particle}}$ ) was determined.  $t$  is the time since start of the decay (time since seed addition  
29 stop) and  $\tau$  and  $b$  are fitted for.

$$\ln(\text{normalized signal}) = -\frac{1}{\tau} * t + b \quad (\text{S1})$$

30 Exemplary the result of the fit for the total surface concentration measured in the SMPS is shown in **Figure S2**. The  
 31 determination via AMS sulfate and ammonium signal as well as the number concentration measurement gave similar results.  
 32 Therefore, the average determined particle lifetime in the chamber of 54 minutes was used. The residence time in the  
 33 chamber was 63 minutes which shows that the seed particles are lost only slightly faster than the flush out rate due to some  
 34 deposition.

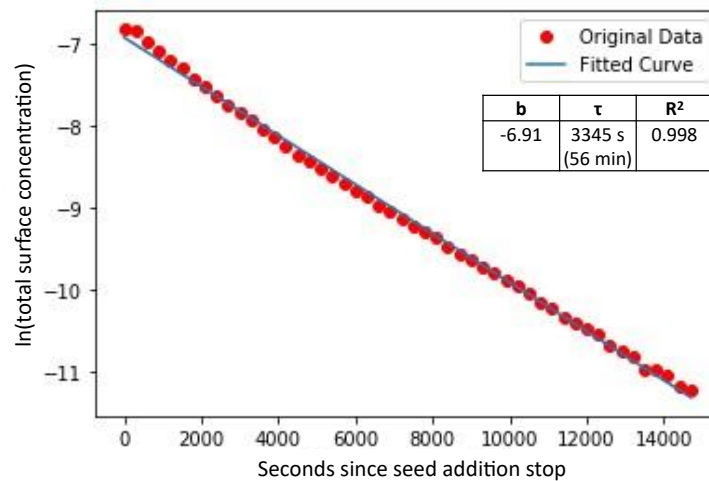

35  
 36 **Figure S2: Logarithmic fit of particle surface decay timeseries to determine particle lifetime in the chamber**

### 37 S3 Box model input parameters

38 The input parameters into the model are defined by the flows into the reactor and consist of the flows themselves, their  
 39 humidity and the contained  $\alpha$ -pinene, O<sub>3</sub> and CO concentration. Additional inputs are the temperature, pressure, and J(O<sup>1</sup>D).  
 40 The UVC light is characterized by an on/off switch and the gap opening of the shielding. In separate experiments J(O<sup>1</sup>D) was  
 41 calculated from O<sub>3</sub> loss as a function of the gap opening. Other necessary input parameters are the OH background reactivity  
 42 (loss of OH without VOC present) and the wall loss of the RO<sub>2</sub> and HO<sub>2</sub> species in the STAR chamber. It is assumed that the  
 43 product species in the MCM are too volatile to be lost on the walls, but that the radical species are lost upon wall collision.  
 44 An OH background reactivity measurement (kOH instrument, see Lou et al. (2010), Fuchs et al. (2017) for more detailed  
 45 information) was performed in the empty, very clean chamber at the same humidity as in the experiments. This yielded a  
 46 reactivity of 3 s<sup>-1</sup>. The background reactivity was adapted to represent the  $\alpha$ -pinene consumption in the photooxidation phase  
 47 correctly, resulting in a maximum  $k_{OH \text{ Background}} = 5 \text{ s}^{-1}$ . A possible reason for the discrepancy is that the background  
 48 reactivity determination was done in a very clean chamber while during the experiment series small residual contaminations,  
 49 resisting flushing over > 6 residence times, may have contributed to the background reactivity.

50 For the estimation of the maximum wall loss the following experiment was performed twice: In a gas phase  $\alpha$ -pinene  
51 photooxidation steady state the light was turned off and the decay of HOM product signals were observed in the NO<sub>3</sub>-MION-  
52 CIMS. This approach was used before by Ehn et al. (2014) and Sarrafzadeh et al. (2016) to determine the maximum loss in  
53 the JPAC chamber.

54 Only products showing a clear single exponential decay were considered and it is assumed that the chosen HOMs are no  
55 longer produced after light off and lost on wall contact. Their timeseries is used to calculate an individual lifetime  $\tau$  by  
56 fitting the decay curve to the function shown in **Eq. (S1)**. From the observation of the decay of C10 products an average  
57 lifetime of  $\tau=171$  s is determined.

58 The derived wall loss rate for HOM was also applied to describe the wall loss of RO<sub>2</sub> radicals, and therefore,  $k_{RO_2\ wall}$  is set  
59 as  $1/170$  s<sup>-1</sup>. The lifetime is correlated to the transport through the diffusion layer of the chamber thus should scale with the  
60 inverse of the square root of the molar mass (under the assumption of perfect mixing of the chamber core). It is therefore  
61 expected that the smaller HO<sub>2</sub> radical is lost faster due to its faster transport. Additionally, the removal efficiency for HO<sub>2</sub>  
62 and RO<sub>2</sub> radicals might differ further as RO<sub>2</sub> are not lost necessarily on every collision with the wall. The specific RO<sub>2</sub>  
63 removal efficiency depends on the radical's molecular structure (Miyazaki, 2012).

64 To estimate a value for the HO<sub>2</sub> wall loss, the expected diffusion constant for a HOM-Mon, HOM-Acc and HO<sub>2</sub> are  
65 calculated by the parametrization developed by Fuller et al. (1966) and recently reviewed by Tang et al. (2015). The results  
66 can be found in **Table S1**.

67 **Table S1. Calculated diffusion coefficients of an exemplary HOM-Mon, exemplary HOM-Acc and HO<sub>2</sub>**

| Compound                                                        | Diffusion constant at 1 bar (cm <sup>2</sup> s <sup>-1</sup> ) |
|-----------------------------------------------------------------|----------------------------------------------------------------|
| C <sub>10</sub> H <sub>15</sub> O <sub>6</sub> (HOM-Mon proxy)  | 0.053                                                          |
| C <sub>20</sub> H <sub>30</sub> O <sub>10</sub> (HOM-Acc proxy) | 0.038                                                          |
| HO <sub>2</sub>                                                 | 0.202                                                          |

68  
69 If the wall loss is only dependent on the diffusion to the wall (i.e. 100 % loss on wall contact), the lifetime should inversely  
70 scale with the diffusion speed. To verify this assumption, the ratio of the average lifetimes of HOM-Mon and HOM-Acc  
71 were compared to the ratio of their diffusion constants: The HOM-Acc proxy's diffusion constant is 0.71 of the monomer  
72 proxy's diffusion constant. The observed accretion products decay resulted in average lifetime of  $\tau=202$  s, leading to  
73  $k_{HOM-Acc\ wall} / k_{HOM-Mon\ wall} = 0.85$ . Within the uncertainties of the diffusion constants calculation and the lifetime  
74 determination, the wall loss seems to depend indeed on the diffusion to the surface layer, thus on the diffusion constant.  
75 Therefore, considering the diffusion constant of HO<sub>2</sub>,  $k_{HO_2\ wall} = 1/50$  s<sup>-1</sup> is chosen.

76 To study the sensitivity of the modelled HO<sub>2</sub>/RO<sub>2</sub> ratio to the assumed wall loss rates, a sensitivity study was performed by  
 77 varying the rate coefficients for wall losses. The RO<sub>2</sub> wall loss was varied within 1σ of the determined HOM product wall  
 78 loss. The HO<sub>2</sub> wall loss was varied in a wider range to cover the case that not all collision with the wall lead to loss of HO<sub>2</sub>.  
 79 Therefore, the lifetime of HO<sub>2</sub> was either set as 50 s or to a maximum lifetime of 170 s as determined by HOM monomer  
 80 loss. The resulting HO<sub>2</sub>/RO<sub>2</sub> ratios of the sensitivity study for the Exp1 experiment are displayed in **Table S2** as an example.

81 **Table S2. Box model HO<sub>2</sub>/RO<sub>2</sub> ratio results at varying RO<sub>2</sub> and HO<sub>2</sub> wall loss at low HO<sub>2</sub>/RO<sub>2</sub> (left) and high HO<sub>2</sub>/RO<sub>2</sub> (right in**  
 82 **the Exp1 experiment**

| $\tau(\text{HO}_2) \backslash \tau(\text{RO}_2)$ | low HO <sub>2</sub> /RO <sub>2</sub> |              | high HO <sub>2</sub> /RO <sub>2</sub> |              |
|--------------------------------------------------|--------------------------------------|--------------|---------------------------------------|--------------|
|                                                  | <u>50 s</u>                          | <u>170 s</u> | <u>50 s</u>                           | <u>170 s</u> |
| <u>145 s</u>                                     | 6.8E-3                               | 7.5E-3       | 0.7                                   | 1.0          |
| <u>170 s</u>                                     | 6.4E-3                               | 7.0E-3       | 0.6                                   | 0.9          |
| <u>195 s</u>                                     | 6.1E-3                               | 6.7E-3       | 0.6                                   | 0.9          |

83  
 84 The sensitivity study shows that independent of the assumed wall loss rate the HO<sub>2</sub>/RO<sub>2</sub> ratio is around 0.007 and near one  
 85 in the low and high HO<sub>2</sub>/RO<sub>2</sub> case, respectively. In any case, the modelling results are only used to qualify the change of  
 86 chemical regime and not to yield absolute values.

87

88 S4 Peaklist of oxidation products identified in NO<sub>3</sub>-MION-CIMS

89 Table S3. Peaklist NO<sub>3</sub>-MION-CIMS. All compounds were detected as clusters with (NO<sub>3</sub>). The table is sorted into fragments,  
 90 monomers, and accretion products. Some compounds were just assignable in certain experiments, this is indicated by the  
 91 superscript, no superscript indicated that the compound was assigned in all experiments.

| Fragments                                                      |                                                                | Monomers                                                         | Accretion products                                               |                                                                  |                                                                  |                                                 |  |
|----------------------------------------------------------------|----------------------------------------------------------------|------------------------------------------------------------------|------------------------------------------------------------------|------------------------------------------------------------------|------------------------------------------------------------------|-------------------------------------------------|--|
| C <sub>5</sub> H <sub>6</sub> O <sub>4</sub> <sup>E1</sup>     | C <sub>8</sub> H <sub>10</sub> O <sub>6</sub>                  | C <sub>10</sub> H <sub>14</sub> O <sub>5</sub>                   | C <sub>14</sub> H <sub>20</sub> O <sub>9</sub>                   | C <sub>17</sub> H <sub>24</sub> O <sub>7</sub>                   | C <sub>19</sub> H <sub>26</sub> O <sub>8</sub> <sup>E1,E2</sup>  | C <sub>20</sub> H <sub>28</sub> O <sub>9</sub>  |  |
| C <sub>5</sub> H <sub>6</sub> O <sub>5</sub>                   | C <sub>8</sub> H <sub>10</sub> O <sub>7</sub>                  | C <sub>10</sub> H <sub>14</sub> O <sub>6</sub>                   | C <sub>14</sub> H <sub>22</sub> O <sub>10</sub>                  | C <sub>17</sub> H <sub>24</sub> O <sub>9</sub>                   | C <sub>19</sub> H <sub>28</sub> O <sub>7</sub>                   | C <sub>20</sub> H <sub>28</sub> O <sub>11</sub> |  |
| C <sub>5</sub> H <sub>6</sub> O <sub>6</sub>                   | C <sub>8</sub> H <sub>10</sub> O <sub>10</sub> <sup>E1</sup>   | C <sub>10</sub> H <sub>14</sub> O <sub>7</sub>                   | C <sub>14</sub> H <sub>22</sub> O <sub>11</sub> <sup>E1,E2</sup> | C <sub>17</sub> H <sub>24</sub> O <sub>10</sub> <sup>E1,E2</sup> | C <sub>19</sub> H <sub>28</sub> O <sub>8</sub>                   | C <sub>20</sub> H <sub>30</sub> O <sub>6</sub>  |  |
| C <sub>5</sub> H <sub>6</sub> O <sub>7</sub>                   | C <sub>8</sub> H <sub>12</sub> O <sub>5</sub> <sup>E1,E2</sup> | C <sub>10</sub> H <sub>14</sub> O <sub>8</sub>                   | C <sub>14</sub> H <sub>26</sub> O <sub>11</sub>                  | C <sub>17</sub> H <sub>24</sub> O <sub>11</sub>                  | C <sub>19</sub> H <sub>28</sub> O <sub>9</sub>                   | C <sub>20</sub> H <sub>30</sub> O <sub>7</sub>  |  |
| C <sub>5</sub> H <sub>6</sub> O <sub>8</sub> <sup>E2</sup>     | C <sub>8</sub> H <sub>12</sub> O <sub>6</sub>                  | C <sub>10</sub> H <sub>14</sub> O <sub>9</sub>                   |                                                                  | C <sub>17</sub> H <sub>24</sub> O <sub>13</sub> <sup>E1,E2</sup> | C <sub>19</sub> H <sub>28</sub> O <sub>10</sub>                  | C <sub>20</sub> H <sub>30</sub> O <sub>8</sub>  |  |
| C <sub>5</sub> H <sub>7</sub> O <sub>8</sub>                   | C <sub>8</sub> H <sub>12</sub> O <sub>7</sub>                  | C <sub>10</sub> H <sub>14</sub> O <sub>10</sub>                  | C <sub>15</sub> H <sub>20</sub> O <sub>14</sub> <sup>E1</sup>    | C <sub>17</sub> H <sub>26</sub> O <sub>8</sub>                   | C <sub>19</sub> H <sub>28</sub> O <sub>11</sub>                  | C <sub>20</sub> H <sub>30</sub> O <sub>9</sub>  |  |
| C <sub>5</sub> H <sub>8</sub> O <sub>7</sub>                   | C <sub>8</sub> H <sub>12</sub> O <sub>8</sub>                  | C <sub>10</sub> H <sub>14</sub> O <sub>11</sub>                  | C <sub>15</sub> H <sub>22</sub> O <sub>9</sub>                   | C <sub>17</sub> H <sub>26</sub> O <sub>9</sub>                   | C <sub>19</sub> H <sub>28</sub> O <sub>12</sub> <sup>E1,E2</sup> | C <sub>20</sub> H <sub>30</sub> O <sub>10</sub> |  |
|                                                                | C <sub>8</sub> H <sub>12</sub> O <sub>9</sub>                  |                                                                  | C <sub>15</sub> H <sub>22</sub> O <sub>10</sub>                  | C <sub>17</sub> H <sub>26</sub> O <sub>10</sub>                  | C <sub>19</sub> H <sub>28</sub> O <sub>13</sub>                  | C <sub>20</sub> H <sub>30</sub> O <sub>11</sub> |  |
| C <sub>6</sub> H <sub>6</sub> O <sub>4</sub> <sup>E1,E3</sup>  | C <sub>8</sub> H <sub>13</sub> O <sub>8</sub>                  | C <sub>10</sub> H <sub>15</sub> O <sub>5</sub>                   | C <sub>15</sub> H <sub>22</sub> O <sub>11</sub>                  | C <sub>17</sub> H <sub>26</sub> O <sub>11</sub>                  | C <sub>19</sub> H <sub>28</sub> O <sub>14</sub> <sup>E1,E2</sup> | C <sub>20</sub> H <sub>30</sub> O <sub>12</sub> |  |
| C <sub>6</sub> H <sub>10</sub> O <sub>5</sub>                  | C <sub>8</sub> H <sub>13</sub> O <sub>9</sub>                  | C <sub>10</sub> H <sub>15</sub> O <sub>6</sub>                   | C <sub>15</sub> H <sub>22</sub> O <sub>12</sub> <sup>E1,E2</sup> | C <sub>17</sub> H <sub>26</sub> O <sub>12</sub>                  | C <sub>19</sub> H <sub>28</sub> O <sub>15</sub> <sup>E1</sup>    | C <sub>20</sub> H <sub>30</sub> O <sub>13</sub> |  |
| C <sub>6</sub> H <sub>10</sub> O <sub>6</sub>                  | C <sub>8</sub> H <sub>14</sub> O <sub>5</sub>                  | C <sub>10</sub> H <sub>15</sub> O <sub>7</sub>                   | C <sub>15</sub> H <sub>22</sub> O <sub>13</sub> <sup>E1</sup>    | C <sub>17</sub> H <sub>26</sub> O <sub>13</sub> <sup>E1,E2</sup> | C <sub>19</sub> H <sub>28</sub> O <sub>16</sub> <sup>E1,E2</sup> | C <sub>20</sub> H <sub>30</sub> O <sub>14</sub> |  |
| C <sub>6</sub> H <sub>10</sub> O <sub>7</sub>                  | C <sub>8</sub> H <sub>14</sub> O <sub>6</sub>                  | C <sub>10</sub> H <sub>15</sub> O <sub>8</sub>                   | C <sub>15</sub> H <sub>22</sub> O <sub>14</sub> <sup>E1</sup>    | C <sub>17</sub> H <sub>26</sub> O <sub>14</sub> <sup>E1,E2</sup> | C <sub>19</sub> H <sub>30</sub> O <sub>6</sub>                   | C <sub>20</sub> H <sub>30</sub> O <sub>15</sub> |  |
|                                                                | C <sub>8</sub> H <sub>14</sub> O <sub>7</sub>                  | C <sub>10</sub> H <sub>15</sub> O <sub>9</sub>                   | C <sub>15</sub> H <sub>24</sub> O <sub>13</sub> <sup>E1,E2</sup> | C <sub>17</sub> H <sub>28</sub> O <sub>8</sub>                   | C <sub>19</sub> H <sub>30</sub> O <sub>7</sub>                   | C <sub>20</sub> H <sub>30</sub> O <sub>16</sub> |  |
| C <sub>7</sub> H <sub>8</sub> O <sub>5</sub> <sup>E3</sup>     | C <sub>8</sub> H <sub>14</sub> O <sub>8</sub>                  | C <sub>10</sub> H <sub>15</sub> O <sub>10</sub>                  | C <sub>15</sub> H <sub>26</sub> O <sub>10</sub> <sup>E1,E2</sup> | C <sub>17</sub> H <sub>28</sub> O <sub>9</sub>                   | C <sub>19</sub> H <sub>30</sub> O <sub>8</sub>                   | C <sub>20</sub> H <sub>30</sub> O <sub>18</sub> |  |
| C <sub>7</sub> H <sub>8</sub> O <sub>6</sub> <sup>E3</sup>     | C <sub>8</sub> H <sub>14</sub> O <sub>9</sub>                  | C <sub>10</sub> H <sub>15</sub> O <sub>11</sub>                  |                                                                  | C <sub>17</sub> H <sub>28</sub> O <sub>10</sub>                  | C <sub>19</sub> H <sub>30</sub> O <sub>9</sub>                   | C <sub>20</sub> H <sub>32</sub> O <sub>6</sub>  |  |
| C <sub>7</sub> H <sub>8</sub> O <sub>7</sub>                   |                                                                | C <sub>10</sub> H <sub>15</sub> O <sub>12</sub>                  | C <sub>16</sub> H <sub>22</sub> O <sub>9</sub> <sup>E1,E2</sup>  | C <sub>17</sub> H <sub>28</sub> O <sub>11</sub>                  | C <sub>19</sub> H <sub>30</sub> O <sub>10</sub>                  | C <sub>20</sub> H <sub>32</sub> O <sub>7</sub>  |  |
| C <sub>7</sub> H <sub>8</sub> O <sub>8</sub>                   | C <sub>9</sub> H <sub>12</sub> O <sub>5</sub>                  |                                                                  | C <sub>16</sub> H <sub>24</sub> O <sub>9</sub>                   | C <sub>17</sub> H <sub>28</sub> O <sub>12</sub>                  | C <sub>19</sub> H <sub>30</sub> O <sub>11</sub>                  | C <sub>20</sub> H <sub>32</sub> O <sub>8</sub>  |  |
| C <sub>7</sub> H <sub>10</sub> O <sub>5</sub> <sup>E1,E3</sup> | C <sub>9</sub> H <sub>12</sub> O <sub>6</sub>                  | C <sub>10</sub> H <sub>16</sub> O <sub>4</sub>                   | C <sub>16</sub> H <sub>24</sub> O <sub>10</sub>                  |                                                                  | C <sub>19</sub> H <sub>30</sub> O <sub>12</sub>                  | C <sub>20</sub> H <sub>32</sub> O <sub>9</sub>  |  |
| C <sub>7</sub> H <sub>10</sub> O <sub>6</sub>                  | C <sub>9</sub> H <sub>12</sub> O <sub>7</sub>                  | C <sub>10</sub> H <sub>16</sub> O <sub>5</sub>                   | C <sub>16</sub> H <sub>24</sub> O <sub>11</sub>                  | C <sub>18</sub> H <sub>26</sub> O <sub>9</sub>                   | C <sub>19</sub> H <sub>30</sub> O <sub>13</sub>                  | C <sub>20</sub> H <sub>32</sub> O <sub>10</sub> |  |
| C <sub>7</sub> H <sub>10</sub> O <sub>7</sub>                  | C <sub>9</sub> H <sub>12</sub> O <sub>8</sub>                  | C <sub>10</sub> H <sub>16</sub> O <sub>6</sub>                   | C <sub>16</sub> H <sub>24</sub> O <sub>12</sub> <sup>E1,E2</sup> | C <sub>18</sub> H <sub>26</sub> O <sub>10</sub>                  | C <sub>19</sub> H <sub>30</sub> O <sub>14</sub> <sup>E1,E2</sup> | C <sub>20</sub> H <sub>32</sub> O <sub>11</sub> |  |
| C <sub>7</sub> H <sub>10</sub> O <sub>8</sub>                  | C <sub>9</sub> H <sub>12</sub> O <sub>9</sub>                  | C <sub>10</sub> H <sub>16</sub> O <sub>7</sub>                   | C <sub>16</sub> H <sub>26</sub> O <sub>8</sub>                   | C <sub>18</sub> H <sub>26</sub> O <sub>11</sub>                  | C <sub>19</sub> H <sub>30</sub> O <sub>15</sub> <sup>E1,E2</sup> | C <sub>20</sub> H <sub>32</sub> O <sub>12</sub> |  |
| C <sub>7</sub> H <sub>10</sub> O <sub>9</sub> <sup>E1,E2</sup> | C <sub>9</sub> H <sub>12</sub> O <sub>12</sub> <sup>E2</sup>   | C <sub>10</sub> H <sub>16</sub> O <sub>8</sub>                   | C <sub>16</sub> H <sub>26</sub> O <sub>9</sub>                   | C <sub>18</sub> H <sub>26</sub> O <sub>15</sub> <sup>E1</sup>    | C <sub>19</sub> H <sub>30</sub> O <sub>16</sub> <sup>E1</sup>    | C <sub>20</sub> H <sub>32</sub> O <sub>13</sub> |  |
| C <sub>7</sub> H <sub>10</sub> O <sub>10</sub>                 | C <sub>9</sub> H <sub>13</sub> O <sub>9</sub>                  | C <sub>10</sub> H <sub>16</sub> O <sub>9</sub>                   | C <sub>16</sub> H <sub>26</sub> O <sub>10</sub>                  | C <sub>18</sub> H <sub>28</sub> O <sub>6</sub>                   | C <sub>19</sub> H <sub>32</sub> O <sub>7</sub>                   | C <sub>20</sub> H <sub>32</sub> O <sub>14</sub> |  |
| C <sub>7</sub> H <sub>14</sub> O <sub>5</sub> <sup>E1,E2</sup> | C <sub>9</sub> H <sub>13</sub> O <sub>10</sub>                 | C <sub>10</sub> H <sub>16</sub> O <sub>10</sub>                  | C <sub>16</sub> H <sub>26</sub> O <sub>11</sub>                  | C <sub>18</sub> H <sub>28</sub> O <sub>8</sub>                   | C <sub>19</sub> H <sub>32</sub> O <sub>8</sub>                   | C <sub>20</sub> H <sub>32</sub> O <sub>15</sub> |  |
| C <sub>7</sub> H <sub>14</sub> O <sub>6</sub>                  | C <sub>9</sub> H <sub>14</sub> O <sub>4</sub>                  | C <sub>10</sub> H <sub>16</sub> O <sub>11</sub>                  | C <sub>16</sub> H <sub>26</sub> O <sub>12</sub>                  | C <sub>18</sub> H <sub>28</sub> O <sub>9</sub> <sup>E1</sup>     | C <sub>19</sub> H <sub>32</sub> O <sub>9</sub>                   | C <sub>20</sub> H <sub>34</sub> O <sub>6</sub>  |  |
|                                                                | C <sub>9</sub> H <sub>14</sub> O <sub>5</sub>                  |                                                                  | C <sub>16</sub> H <sub>26</sub> O <sub>13</sub> <sup>E2</sup>    | C <sub>18</sub> H <sub>28</sub> O <sub>10</sub>                  | C <sub>19</sub> H <sub>32</sub> O <sub>10</sub>                  | C <sub>20</sub> H <sub>34</sub> O <sub>7</sub>  |  |
|                                                                | C <sub>9</sub> H <sub>14</sub> O <sub>6</sub>                  | C <sub>10</sub> H <sub>17</sub> O <sub>6</sub>                   | C <sub>16</sub> H <sub>28</sub> O <sub>18</sub> <sup>E1,E2</sup> | C <sub>18</sub> H <sub>28</sub> O <sub>11</sub>                  | C <sub>19</sub> H <sub>32</sub> O <sub>11</sub>                  | C <sub>20</sub> H <sub>34</sub> O <sub>8</sub>  |  |
|                                                                | C <sub>9</sub> H <sub>14</sub> O <sub>7</sub>                  | C <sub>10</sub> H <sub>17</sub> O <sub>7</sub>                   |                                                                  | C <sub>18</sub> H <sub>28</sub> O <sub>12</sub> <sup>E1,E2</sup> | C <sub>19</sub> H <sub>32</sub> O <sub>12</sub>                  | C <sub>20</sub> H <sub>34</sub> O <sub>9</sub>  |  |
|                                                                | C <sub>9</sub> H <sub>14</sub> O <sub>8</sub>                  | C <sub>10</sub> H <sub>17</sub> O <sub>8</sub>                   |                                                                  | C <sub>18</sub> H <sub>28</sub> O <sub>13</sub>                  | C <sub>19</sub> H <sub>32</sub> O <sub>13</sub> <sup>E1</sup>    | C <sub>20</sub> H <sub>34</sub> O <sub>10</sub> |  |
|                                                                | C <sub>9</sub> H <sub>14</sub> O <sub>9</sub>                  | C <sub>10</sub> H <sub>17</sub> O <sub>9</sub>                   |                                                                  | C <sub>18</sub> H <sub>28</sub> O <sub>14</sub> <sup>E1,E3</sup> | C <sub>19</sub> H <sub>32</sub> O <sub>14</sub> <sup>E1,E2</sup> | C <sub>20</sub> H <sub>34</sub> O <sub>11</sub> |  |
|                                                                | C <sub>9</sub> H <sub>14</sub> O <sub>10</sub>                 | C <sub>10</sub> H <sub>17</sub> O <sub>10</sub> <sup>E1,E3</sup> |                                                                  | C <sub>18</sub> H <sub>28</sub> O <sub>15</sub> <sup>E1</sup>    | C <sub>19</sub> H <sub>32</sub> O <sub>7</sub>                   | C <sub>20</sub> H <sub>34</sub> O <sub>12</sub> |  |
|                                                                | C <sub>9</sub> H <sub>16</sub> O <sub>5</sub>                  | C <sub>10</sub> H <sub>17</sub> O <sub>11</sub> <sup>E3</sup>    |                                                                  | C <sub>18</sub> H <sub>28</sub> O <sub>16</sub> <sup>E1,E3</sup> | C <sub>19</sub> H <sub>32</sub> O <sub>8</sub>                   | C <sub>20</sub> H <sub>34</sub> O <sub>13</sub> |  |
|                                                                | C <sub>9</sub> H <sub>16</sub> O <sub>6</sub>                  |                                                                  |                                                                  | C <sub>18</sub> H <sub>30</sub> O <sub>7</sub>                   | C <sub>19</sub> H <sub>32</sub> O <sub>9</sub>                   |                                                 |  |
|                                                                | C <sub>9</sub> H <sub>16</sub> O <sub>7</sub>                  | C <sub>10</sub> H <sub>18</sub> O <sub>4</sub>                   |                                                                  | C <sub>18</sub> H <sub>30</sub> O <sub>8</sub>                   | C <sub>19</sub> H <sub>32</sub> O <sub>10</sub>                  |                                                 |  |
|                                                                | C <sub>9</sub> H <sub>16</sub> O <sub>8</sub>                  | C <sub>10</sub> H <sub>18</sub> O <sub>5</sub>                   |                                                                  | C <sub>18</sub> H <sub>30</sub> O <sub>9</sub>                   | C <sub>19</sub> H <sub>32</sub> O <sub>11</sub>                  |                                                 |  |
|                                                                |                                                                | C <sub>10</sub> H <sub>18</sub> O <sub>6</sub>                   |                                                                  | C <sub>18</sub> H <sub>30</sub> O <sub>10</sub>                  | C <sub>19</sub> H <sub>32</sub> O <sub>12</sub>                  |                                                 |  |
|                                                                |                                                                | C <sub>10</sub> H <sub>18</sub> O <sub>7</sub>                   |                                                                  | C <sub>18</sub> H <sub>30</sub> O <sub>11</sub>                  | C <sub>19</sub> H <sub>32</sub> O <sub>13</sub> <sup>E1,E3</sup> |                                                 |  |
|                                                                |                                                                | C <sub>10</sub> H <sub>18</sub> O <sub>8</sub>                   |                                                                  | C <sub>18</sub> H <sub>30</sub> O <sub>12</sub>                  | C <sub>19</sub> H <sub>32</sub> O <sub>14</sub> <sup>E1,E2</sup> |                                                 |  |
|                                                                |                                                                | C <sub>10</sub> H <sub>18</sub> O <sub>9</sub>                   |                                                                  | C <sub>18</sub> H <sub>30</sub> O <sub>13</sub>                  |                                                                  |                                                 |  |
|                                                                |                                                                |                                                                  |                                                                  | C <sub>18</sub> H <sub>30</sub> O <sub>14</sub> <sup>E1</sup>    |                                                                  |                                                 |  |

92 **S5 Estimation of change in peroxy radical steady state concentration between low and high HO<sub>2</sub>/RO<sub>2</sub>**

93 Starting from the balance equation **Eq. (S2)**, we derived an equation for the steady state concentration (indicated by subscript  
 94 SS) of an [RO<sub>2</sub>]<sub>i</sub> (**Eq. (S3)**). The equations assume a primary production term *Pri<sub>i</sub>* for [RO<sub>2</sub>]<sub>i</sub>, as well as only three  
 95 significant loss pathways: The reaction with the pool of available [RO<sub>2</sub>] with a bulk reaction rate constant *k<sub>RO2RO2</sub>*, the  
 96 reaction with [HO<sub>2</sub>] with a reaction rate of *k<sub>RO2HO2</sub>*=1.85·10<sup>-11</sup> cm<sup>3</sup>·s<sup>-1</sup> at 20 °C as defined in the MCM (Jenkin et al., 1997;  
 97 Saunders et al., 2003) and the wall loss. A wall loss rate coefficient of 1/170 s was used, as determined by our measurements  
 98 for HOM products (see supplement section Fehler! Verweisquelle konnte nicht gefunden werden.). The rate coefficient  
 99 *k<sub>RO2RO2</sub>* was varied in a range 1.0-5.0·10<sup>-12</sup> cm<sup>3</sup>·s<sup>-1</sup>, typical values expected for substituted organic peroxy radicals (Jenkin et  
 100 al., 2019), to determine what bulk rate coefficient would be reconcilable with our observations. To compare directly to the  
 101 measured ratio of HOM-RO<sub>2</sub> signal, we calculated the RO<sub>2</sub> concentration ratio at high to low HO<sub>2</sub>/RO<sub>2</sub> applying **Eq. (S4)**. In  
 102 **Eq. (S4)** the primary production term *Pri<sub>i</sub>* could be eliminated as the primary production was same at high and low  
 103 HO<sub>2</sub>/RO<sub>2</sub> in our experiments.

$$\frac{d[RO_2]_i}{dt} = Pri_i - k_{RO2RO2}[RO_2][RO_2]_i - k_{HO2}[HO_2][RO_2]_i - k_{wall}[RO_2]_i \quad (\text{S2})$$

$$[RO_2]_{i,SS} = \frac{Pri_i}{k_{RO2RO2}[RO_2] + k_{HO2}[HO_2] + k_{wall}} \quad (\text{S3})$$

$$\frac{[RO_2]_{i,SS,highHO2}}{[RO_2]_{i,SS,lowHO2}} = \frac{k_{RO2RO2}[RO_2]_{SS,lowHO2} + k_{HO2}[HO_2]_{SS,lowHO2} + k_{wall}}{k_{RO2RO2}[RO_2]_{SS,highHO2} + k_{HO2}[HO_2]_{SS,highHO2} + k_{wall}} \quad (\text{S4})$$

## 105 S6 Calculation of condensation rate constant $k_{cond}$

106 The condensation rate constant  $k_{cond}$  of each compound was calculated as shown in **Eq. (S5)**. Here  $\alpha$  is the accommodation  
107 coefficient and is set to 1.  $\bar{v}$  is the mean molecular speed calculated from the molar mass of the compound and  $S_{Ptot}$  is the  
108 total particle surface measured in the chamber.  $f_{FS}$  is the Fuchs-Sutugin factor which is calculated as shown in **Eq. (S6)**,  
109 where  $knn$  is the Knudsen Number calculated as shown in **Eq. (S7)**.  $\bar{s}$  represents the mean free path of the molecule and  $p_{dia}$   
110 the particle diameter. For  $p_{dia}$  we used the median diameter of the particle surface distribution measured (McFiggans et al.,  
111 2019).

$$k_{cond} = \alpha * f_{FS} * \frac{\bar{v}}{4} * S_{Ptot} \quad (\text{S5})$$

$$f_{FS} = \frac{1 + knn}{1 + (0.75 * \frac{\alpha}{knn}) + knn + (0.283 * \alpha)} \quad (\text{S6})$$

$$knn = \frac{2 * \bar{s}}{p_{dia}} \quad (\text{S7})$$

## 112 S7 Error estimation via error propagation

113 Error propagation was utilized to estimate the error of derived parameters. For a parameter  $q$ , the error is defined by the  
114 errors of the variables  $x, \dots, z$  necessary to calculate  $q$ . The general equation to calculate the absolute uncertainty  $\delta q$  can be  
115 found in **Eq. (S8)**. This equation is only valid if the uncertainties in  $x, \dots, z$  are independent and random. (Taylor, 1997)

$$\delta q = \sqrt{\left(\frac{\partial q}{\partial x} \delta x\right)^2 + \dots + \left(\frac{\partial q}{\partial z} \delta z\right)^2} \quad (\text{S8})$$

116 For all measured parameters the measured standard deviation in steady state was used as the absolute uncertainty. For  
117 parameters that cannot be measured directly their uncertainties were calculated with error propagation as shown in **Eq. (S8)**.  
118 For the diffusion coefficient and the OH concentration we used uncertainties reported in the literature: Tang et al. (2015)  
119 reviewed diffusion coefficient calculation and came to the result that the difference between measurement and estimation via  
120 the method of Fuller et al. (1966) are mostly below 10 %. Therefore, we assumed a 10 % uncertainty for the diffusion  
121 coefficient of each formula composition. We assumed an uncertainty of 20 % for the OH concentration calculation as  
122 published by Wildt et al. (2014).



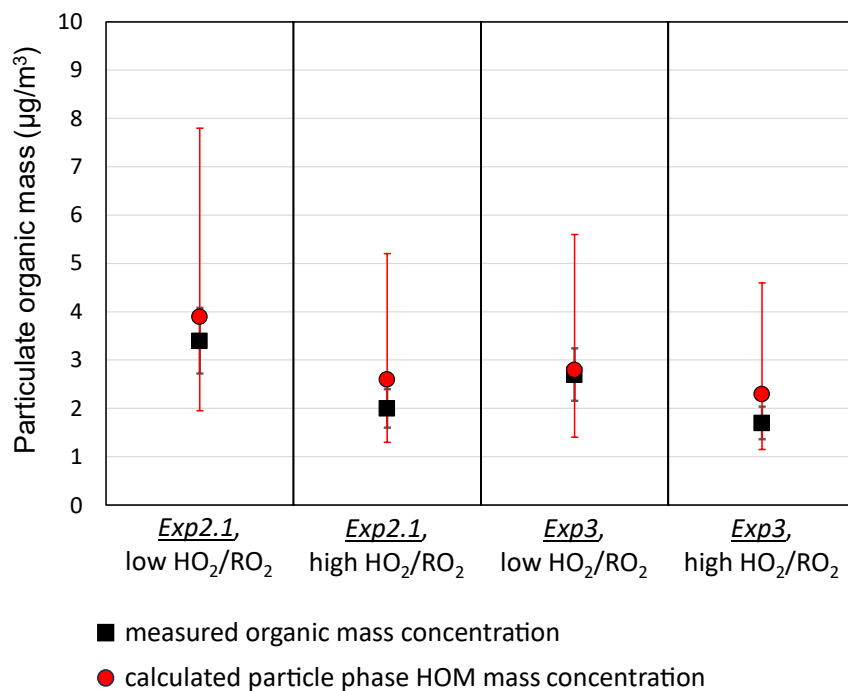

124

125 Figure S3: Comparison of particulate, organic mass concentration (measured by AMS) and approximation from NO<sub>3</sub>-  
 126 MION-CIMS measurements. Error of AMS measurement is estimated as 20 %. For calculated particle phase HOM mass  
 127 concentration we assumed an uncertainty of factor 2 in the calibration factor (He et al., 2023).

- 129 Ehn, M., Thornton, J. A., Kleist, E., Sipila, M., Junninen, H., Pullinen, I., Springer, M., Rubach, F., Tillmann, R., Lee, B.,  
130 Lopez-Hilfiker, F., Andres, S., Acir, I. H., Rissanen, M., Jokinen, T., Schobesberger, S., Kangasluoma, J., Kontkanen, J.,  
131 Nieminen, T., Kurtén, T., Nielsen, L. B., Jorgensen, S., Kjaergaard, H. G., Canagaratna, M., Maso, M. D., Berndt, T., Petaja,  
132 T., Wahner, A., Kerminen, V. M., Kulmala, M., Worsnop, D. R., Wildt, J., and Mentel, T. F.: A large source of low-  
133 volatility secondary organic aerosol, *Nature*, 506, 476-479, <https://doi.org/10.1038/nature13032>, 2014.
- 134 Fuchs, H., Tan, Z. F., Lu, K. D., Bohn, B., Broch, S., Brown, S. S., Dong, H. B., Gomm, S., Häsel, R., He, L. Y.,  
135 Hofzumahaus, A., Holland, F., Li, X., Liu, Y., Lu, S. H., Min, K. E., Rohrer, F., Shao, M., Wang, B. L., Wang, M., Wu, Y.  
136 S., Zeng, L. M., Zhang, Y. S., Wahner, A., and Zhang, Y. H.: OH reactivity at a rural site (Wangdu) in the North China  
137 Plain: contributions from OH reactants and experimental OH budget, *Atmos. Chem. Phys.*, 17, 645-661,  
138 <https://doi.org/10.5194/acp-17-645-2017>, 2017.
- 139 Fuller, E. N., Schettler, P. D., and Giddings, J. C.: New method for prediction of binary gas-phase diffusion coefficients,  
140 *Industrial & Engineering Chemistry*, 58, 18-27, <https://doi.org/10.1021/ie50677a007>, 1966.
- 141 He, X.-C., Shen, J., Iyer, S., Juuti, P., Zhang, J., Koirala, M., Kytökari, M. M., Worsnop, D. R., Rissanen, M., Kulmala, M.,  
142 Maier, N. M., Mikkilä, J., Sipilä, M., and Kangasluoma, J.: Characterisation of gaseous iodine species detection using the  
143 multi-scheme chemical ionisation inlet 2 with bromide and nitrate chemical ionisation methods, *Atmos. Meas. Tech.*, 16,  
144 4461-4487, <https://doi.org/10.5194/amt-16-4461-2023>, 2023.
- 145 Jenkin, M. E., Saunders, S. M., and Pilling, M. J.: The tropospheric degradation of volatile organic compounds: a protocol  
146 for mechanism development, *Atmos. Environ.*, 31, 81-104, [https://doi.org/10.1016/S1352-2310\(96\)00105-7](https://doi.org/10.1016/S1352-2310(96)00105-7), 1997.
- 147 Jenkin, M. E., Valorso, R., Aumont, B., and Rickard, A. R.: Estimation of rate coefficients and branching ratios for reactions  
148 of organic peroxy radicals for use in automated mechanism construction, *Atmos. Chem. Phys.*, 19, 7691-7717,  
149 <https://doi.org/10.5194/acp-19-7691-2019>, 2019.
- 150 Kürten, A., Rondo, L., Ehrhart, S., and Curtius, J.: Calibration of a chemical ionization mass spectrometer for the  
151 measurement of gaseous sulfuric acid, *J. Phys. Chem. A*, 116, 6375-6386, <https://doi.org/10.1021/jp212123n>, 2012.
- 152 Lou, S., Holland, F., Rohrer, F., Lu, K., Bohn, B., Brauers, T., Chang, C. C., Fuchs, H., Häsel, R., Kita, K., Kondo, Y., Li,  
153 X., Shao, M., Zeng, L., Wahner, A., Zhang, Y., Wang, W., and Hofzumahaus, A.: Atmospheric OH reactivities in the Pearl  
154 River Delta - China in summer 2006: measurement and model results, *Atmos. Chem. Phys.*, 10, 11243-11260,  
155 <https://doi.org/10.5194/acp-10-11243-2010>, 2010.
- 156 McFiggans, G., Mentel, T. F., Wildt, J., Pullinen, I., Kang, S., Kleist, E., Schmitt, S., Springer, M., Tillmann, R., Wu, C.,  
157 Zhao, D., Hallquist, M., Faxon, C., Le Breton, M., Hallquist, A. M., Simpson, D., Bergstrom, R., Jenkin, M. E., Ehn, M.,  
158 Thornton, J. A., Alfarra, M. R., Bannan, T. J., Percival, C. J., Priestley, M., Topping, D., and Kiendler-Scharr, A.: Secondary  
159 organic aerosol reduced by mixture of atmospheric vapours, *Nature*, 565, 587-593, [https://doi.org/10.1038/s41586-018-](https://doi.org/10.1038/s41586-018-0871-y)  
160 [0871-y](https://doi.org/10.1038/s41586-018-0871-y), 2019.
- 161 Miyazaki, K.: Study of the nature and roles of peroxy radicals in the atmosphere towards the understanding of oxidant  
162 formation using laser-flash photolysis and LIF detection technique, Tokyo Metropolitan University; University of Lille,  
163 2012.
- 164 Rissanen, M. P., Mikkilä, J., Iyer, S., and Hakala, J.: Multi-scheme chemical ionization inlet (MION) for fast switching of  
165 reagent ion chemistry in atmospheric pressure chemical ionization mass spectrometry (CIMS) applications, *Atmos. Meas.*  
166 *Tech.*, 12, 6635-6646, <https://doi.org/10.5194/amt-12-6635-2019>, 2019.
- 167 Sarrafzadeh, M., Wildt, J., Pullinen, I., Springer, M., Kleist, E., Tillmann, R., Schmitt, S. H., Wu, C., Mentel, T. F., and  
168 Zhao, D.: Impact of NO<sub>x</sub> and OH on secondary organic aerosol formation from  $\beta$ -pinene photooxidation, *Atmospheric*  
169 *chemistry and physics*, 16, 11237-11248, 2016.
- 170 Saunders, S. M., Jenkin, M. E., Derwent, R., and Pilling, M.: Protocol for the development of the Master Chemical  
171 Mechanism, MCM v3 (Part A): tropospheric degradation of non-aromatic volatile organic compounds, *Atmos. Chem. Phys.*,  
172 3, 161-180, <https://doi.org/10.5194/acp-3-161-2003>, 2003.
- 173 Shen, J. and He, X.-C.: MARFORCE-Flowtube model, <https://github.com/momo-catcat/MARFORCE-flowtube> [code],  
174 <https://doi.org/10.5281/zenodo.8318790>, 2023.
- 175 Tang, M., Shiraiwa, M., Pöschl, U., Cox, R., and Kalberer, M.: Compilation and evaluation of gas phase diffusion  
176 coefficients of reactive trace gases in the atmosphere: Volume 2. Diffusivities of organic compounds, pressure-normalised

177 mean free paths, and average Knudsen numbers for gas uptake calculations, *Atmos. Chem. Phys.*, 15, 5585-5598,  
178 <https://doi.org/10.5194/acp-15-5585-2015>, 2015.  
179 Taylor, J.: *Introduction to error analysis, the study of uncertainties in physical measurements*, 1997.  
180 Wildt, J., Mentel, T. F., Kiendler-Scharr, A., Hoffmann, T., Andres, S., Ehn, M., Kleist, E., M $\ddot{u}$ sgen, P., Rohrer, F., Rudich,  
181 Y., Springer, M., Tillmann, R., and Wahner, A.: Suppression of new particle formation from monoterpene oxidation by  
182 NO $_x$ , *Atmos. Chem. Phys.*, 14, 2789-2804, <https://doi.org/10.5194/acp-14-2789-2014>, 2014.  
183
